# Supplementary material for: Stereoselective coordination chemistry of the tetradentate chelating ligand (2R,3R)-bis(2,2′-dipyridyl-5-methoxyl)butane
Source: Royal Society of Chemistry journal article supplement (doi:10.1039/b303803c), 2003-01-01
Supplement: b303803c.pdf [file b303803c.pdf]

**Manuscript B303803C Supplementary Data.**

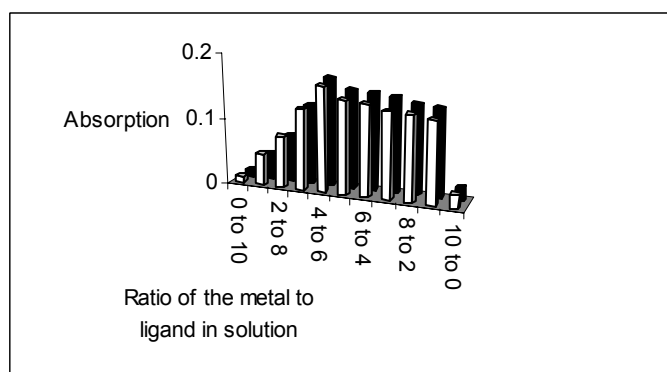

**Fig. A.1** UV/vis. absorption spectrum of a  $\text{FeCl}_2$  solution in methanol with a solution of  $\text{L}^{3\text{RR}}$  in methanol at a constant total concentration  $2.68 \times 10^{-5} \text{ mol dm}^{-3}$  ( $[\text{M}]+[\text{L}]$ ). (Front series monitored at 525nm, back series monitored at 486nm.)

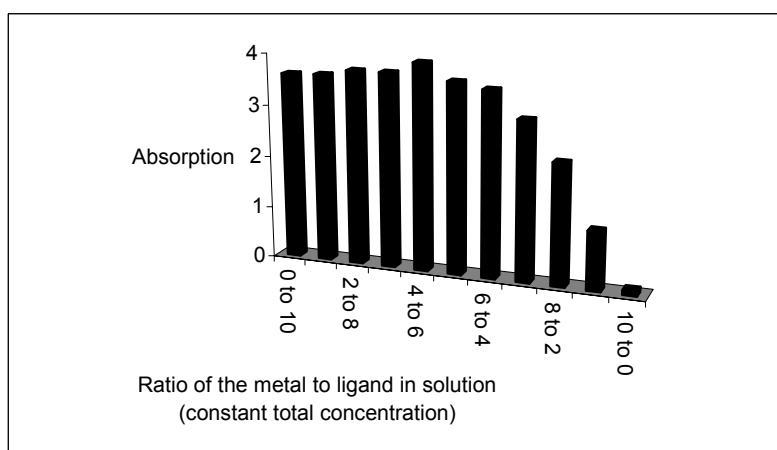

**Fig. A.2** UV/vis. absorption spectrum of a  $\text{Zn}(\text{OAc})_2$  solution in methanol with a solution of  $\text{L}^{3\text{RR}}$  in methanol at a constant total concentration  $5.63 \times 10^{-5} \text{ mol dm}^{-3}$  ( $[\text{M}]+[\text{L}]$ ) at 316 nm.
